# Supplementary material for: Fam49b dampens TCR signal strength to regulate survival of positively selected thymocytes and peripheral T cells
Source: eLife. 2024 Aug 19;13:e76940. doi: 10.7554/eLife.76940 (PMC11333044; doi:10.7554/eLife.76940)
Supplement: Figure 1—figure supplement 1—source data 1. [file elife-76940-fig1-figsupp1-data1.xlsx]

## Sheet: Figure 1-figure supplement 1
	Figure 1-figure supplement 1. Cyrib/Fam49b expression in thymocyte subsets and T cells from WT mice
	Thymocytes subpopulation	WT
	DN1 (CD25-CD44+)	1	1
	DN2 (CD25+CD44+)	1.59	1.49
	DN3 (CD25+CD44-)	1.63	1.46
	DN4 (CD25-CD44-)	1.48	1.27
	DP1 (TCRβlo CD69lo)	0.96	1.11
	DP2 (TCRβint CD69+)	0.83	0.71
	DP3 (TCRβhi CD69+)	0.92	0.87
	CD4 SP	0.94	0.8
	CD8 SP	1.13	0.98
	Spleen CD4 T	0.93	0.82
	Spleen CD8 T	1.17	1.15
	LN CD4 T	0.85	0.74
	LN CD8 T	0.96	0.73
	Each qRT-PCR was run in quadruplicate
	Data are pooled from two independent experiments
