# Supplementary material for: Fam49b dampens TCR signal strength to regulate survival of positively selected thymocytes and peripheral T cells
Source: eLife. 2024 Aug 19;13:e76940. doi: 10.7554/eLife.76940 (PMC11333044; doi:10.7554/eLife.76940)
Supplement: Figure 2—source data 1. [file elife-76940-fig2-data1.xlsx]

## Sheet: 2A
	Figure 2A. Absolute number of lymphocytes in peripheral lymph nodes from WT, Fam49a-KO, and Fam49b-KO mice
	B # (105 cells)	WT	Fam49a-KO	Fam49b-KO		CD4 T # (105 cells)	WT	Fam49a-KO	Fam49b-KO
	1	40.4671	53.2859	40.0956		1	27.13	35.09	19.68
	2	47.0446	51.6144	47.6203		2	28.74	28.03	20.59
	3	49.1277	52.1762	56.0055		3	31.57	38.19	24.09
	4	42.9182	40.1324	30.8491		4	33.42	27.63	16.69
	5	46.7488	36.0567	35.6324		5	28.17	25.74	15.43
	6	39.3244	37.4778	37.3655		6	27.12	32.32	15.54
	7	40.6836	46.3498	35.2165		7	23.58	27.77	16.5
	8	57.9189	39.7625	37.5041		8	34.15	29.3	14.76
	One-way ANOVA			P value=0.2789		One-way ANOVA			P value<0.0001
	CD8 T # (105 cells)	WT	Fam49a-KO	Fam49b-KO
	1	23.16	31.52	12.65
	2	24.49	27.92	13.9
	3	25.99	35.22	15.55
	4	28.37	24.47	10.33
	5	23.55	21.66	11.8
	6	23.62	29.02	11.46
	7	22.6	26.08	9.92
	8	32.92	27.62	8.95
	One-way ANOVA			P value<0.0001
	Data are pooled from two independent experiments

## Sheet: 2B
	Figure 2B. Ratio of CD4 T cells over CD8 T cells in spleen, peripheral lymph nodes, and mesenteric lymph node in WT, Fam49a-KO, and Fam49b-KO mice
	Spleen	WT	Fam49a-KO	Fam49b-KO		PLN	WT	Fam49a-KO	Fam49b-KO
	1	1.58	1.4	1.62		1	1.17	1.11	1.56
	2	1.73	1.41	1.77		2	1.17	1	1.48
	3	1.59	1.39	1.52		3	1.21	1.08	1.55
	4	1.69	1.42	1.51		4	1.18	1.13	1.61
	5	1.72	1.42	1.44		5	1.2	1.19	1.31
	6	1.62	1.58	1.57		6	1.15	1.11	1.36
	7	1.32	1.43	1.71		7	1.04	1.06	1.66
	8	1.39	1.61	1.71		8	1.04	1.06	1.65
	One-way ANOVA			P value=0.0501		One-way ANOVA			P value<0.0001
		There is no significant difference between WT and Fam49b-KO mice
	Turkey's multiple comparisons test		WT vs.Fam49a-KO	Adjusted P Value =0.1296		MLN	WT	Fam49a-KO	Fam49b-KO
	Turkey's multiple comparisons test		WT vs.Fam49b-KO	Adjusted P Value =0.9014		1	1.34	1.42	1.95
	Turkey's multiple comparisons test		Fam49a-KO vs.Fam49b-KO	Adjusted P Value =0.0559		2	1.25	1.2	1.94
						3	1.38	1.2	1.89
						4	1.36	1.26	1.82
						5	1.31	1.29	1.49
						6	1.24	1.38	1.77
						7	1.16	1.37	2.05
						8	1.33	1.28	2.15
						One-way ANOVA			P value<0.0001
	Data are pooled from two independent experiments

## Sheet: 2C
	Figure 2C. Analyzing the expression of CD4 and CD8 in total thymocytes.
	% of TCRβ+ CD8 SP	WT	Fam49b-KO		% of TCRβ+ CD4 SP	WT	Fam49b-KO
	1	2.35	1.03		1	7.73	5.51
	2	2.25	0.937		2	7.89	5.45
	3	2.34	1.14		3	7.99	6.62
	4	2.6	1.01		4	7.69	6.5
	5	1.8	0.989		5	7.14	5.86
	6	1.71	0.997		6	6.29	5.58
	7	1.85	1.33		7	6.8	6.51
	8	1.97	0.704		8	7.34	4.48
	9	1.73	1.02		9	6.98	6.07
	10	1.68	1.5		10	6.45	5.98
	11	1.7	1.16		11	6.59	6.24
	12	1.83	1.03		12	7.96	6.51
	Mann-Whitney test		P value<0.0001		Mann-Whitney test		P value<0.0001
	CD4 SP/CD8 SP	WT	Fam49b-KO
	1	3.29	5.37
	2	3.51	5.81
	3	3.41	5.82
	4	2.95	6.45
	5	3.96	5.93
	6	3.67	5.6
	7	3.68	4.89
	8	3.73	6.36
	9	4.03	5.93
	10	3.83	3.99
	11	3.89	5.4
	12	4.35	6.35
	Mann-Whitney test		P value<0.0001
	Data are representative of three experiments.

## Sheet: 2D
	Figure 2D. Absolute number of Total thymocytes (left), TCRβ+CD8 SP (middle), and TCRβ+CD4 SP (right) from WT, Fam49a-KO, and Fam49b-KO mice.Analyzing the expression of CD4 and CD8 in total thymocytes.
	Total thymocytes # (106 cells)	WT	Fam49b-KO		TCRβhi CD8 SP # (105 cells)	WT	Fam49b-KO
	1	89	94.1		1	20.9	9.65
	2	72	100		2	16.2	9.39
	3	68	67.8		3	15.9	7.7
	4	84.9	99.6		4	15.3	10.1
	5	78.2	78.4		5	13.4	7.76
	6	74.1	55		6	13.7	5.49
	7	82.2	74.7		7	16.2	9.95
	8	87.9	61.5		8	15.2	4.33
	9	70.9	51.9		9	12	7.77
	10	96.5	82.2		10	17.7	9.51
	Mann-Whitney test		P value=0.5514		Mann-Whitney test		P value<0.0001
	TCRβhi CD4 SP # (106 cells)	WT	Fam49b-KO
	1	6.88	5.19
	2	5.68	5.46
	3	5.43	4.48
	4	6.06	6.48
	5	4.91	4.6
	6	5.04	3.07
	7	6.04	4.87
	8	6.13	2.75
	9	4.67	3.1
	10	7.68	5.13
	Mann-Whitney test		P value=0.0124
	Data are representative of three experiments.
