# Supplementary material for: Fam49b dampens TCR signal strength to regulate survival of positively selected thymocytes and peripheral T cells
Source: eLife. 2024 Aug 19;13:e76940. doi: 10.7554/eLife.76940 (PMC11333044; doi:10.7554/eLife.76940)
Supplement: Figure 3—figure supplement 1—source data 1. [file elife-76940-fig3-figsupp1-data1.xlsx]

## Sheet: Figure 3-figure supplement 1A
	Figure 3-figure supplement 1A. Frequency of CD8 T cells and CD4 T cells among CD45.2+ total lymph node cells from bone marrow chimera mice
	% CD8 T cells in CD45.2+ cells	WT	Fam49b-KO		% CD8 T cells in CD45.2+ cells	WT	Fam49b-KO
	1	14.64	11.88		1	30.75	27.52
	2	16.51	11.1		2	35.9	27.45
	3	15.76	12.96		3	32.16	28.65
	4	14.32	9.14		4	33.7	24.01
	5	11.31	7.54		5	26.8	23.42
	6	10.43	8.15		6	25.78	25.18
	7	11.37	8.13		7	28.33	24.67
	Mann-Whitney test		P value=0.0262		Mann-Whitney test		P value=0.0262
	Data are pooled from two independent experiments

## Sheet: Figure 3-figure supplement 1B
	Figure 3-figure supplement 1B. Absolute numbers of CD45.2+ CD8 T cells and CD45.2+ CD4 T cells from bone marrow chimera mice
	CD45.2+ CD8 T # (105 cells)	WT	Fam49b-KO		CD45.2+ CD4 T # (105 cells)	WT	Fam49b-KO
	1	12.59	9.05		1	26.44	20.97
	2	10.2	7.53		2	22.18	18.62
	3	8.73	11.57		3	17.81	25.59
	4	12.17	5.56		4	28.64	14.62
	5	9.73	4.39		5	23.05	13.63
	6	10.62	2.29		6	26.24	7.07
	7	11.24	4.7		7	28.03	14.26
	Mann-Whitney test		P value=0.0102		Mann-Whitney test		P value=0.0114
	Data are pooled from two independent experiments
