# Supplementary material for: Fam49b dampens TCR signal strength to regulate survival of positively selected thymocytes and peripheral T cells
Source: eLife. 2024 Aug 19;13:e76940. doi: 10.7554/eLife.76940 (PMC11333044; doi:10.7554/eLife.76940)
Supplement: Figure 3—figure supplement 2—source data 1. [file elife-76940-fig3-figsupp2-data1.xlsx]

## Sheet: Figure 3-figure supplement 2A
	Figure 3-figure supplement 2A. Geometric MFI of CD5 on CD45.2+ DP thymocytes
	GeoMFI of CD5	WT	Fam49b-KO
	1	1334	1997
	2	1472	2032
	3	1365	1930
	4	1396	1812
	5	1182	2079
	6	1256	1712
	7	1313	1755
	8	1259	1797
	9	1213	1934
	Mann-Whitney test		P value<0.0001
	Data are pooled from two independent experiments

## Sheet: Figure 3-figure supplement 2B
	Figure 3-figure supplement 2B. Analyzing the expression of CD4 and CD8 in total thymocytes from bone marrow chimera mice
	% of TCRβhi CD8 SP in CD45.2+ cells	WT	Fam49b-KO		% of TCRβhi CD4 SP in CD45.2+ cells	WT	Fam49b-KO
	1	3.06	2.21		1	10.68	9.14
	2	3.69	1.92		2	12.38	8.85
	3	2.7	1.81		3	9.24	8.87
	4	2.93	1.43		4	9.94	7.33
	5	1.72	1.95		5	6.29	7.27
	6	2.51	1.48		6	9	7.42
	7	1.84	1.15		7	7.36	6.66
	8	2.14	1.33		8	9.28	6.32
	9	2.11	1.53		9	8.17	6.94
	Mann-Whitney test		P value=0.0034		Mann-Whitney test		P value=0.0490

## Sheet: Figure 3-figure supplement 2C
	Figure 3-figure supplement 2C. Ratio of TCRβhiCD4 SP over TCRβhiCD8 SP in total thymocytes from bone marrow chimera mice
	CD4 SP/CD8 SP	WT	Fam49b-KO
	1	3.49	4.14
	2	3.35	4.62
	3	3.42	4.9
	4	3.4	5.13
	5	3.66	3.72
	6	3.58	5.01
	7	3.99	5.79
	8	4.33	4.75
	9	3.87	4.53
	Mann-Whitney test		P value=0.0005
	Data are representative of two experiments
