# Supplementary material for: Fam49b dampens TCR signal strength to regulate survival of positively selected thymocytes and peripheral T cells
Source: eLife. 2024 Aug 19;13:e76940. doi: 10.7554/eLife.76940 (PMC11333044; doi:10.7554/eLife.76940)
Supplement: Figure 3—source data 1. [file elife-76940-fig3-data1.xlsx]

## Sheet: 3A
	Figure 3A. Frequency of TCRβ expressing cells among CD45.2+ total lymph node cells from bone marrow chimera mice
	% of CD45.2+ T	WT	Fam49b-KO
	1	45.9	43
	2	46.8	40
	3	48.5	39.1
	4	49.2	42.2
	5	42.2	34.1
	6	51.1	33.8
	7	42.1	33.2
	Mann-Whitney test		P value=0.0047
	Data are pooled from two independent experiments

## Sheet: 3B
	Figure 3B. Ratio of CD4 T cells over CD8 T cells in CD45.2+ total lymph node cells from bone marrow chimera mice
	CD4 SP/CD8 SP	WT	Fam49b-KO
	1	2.1	2.32
	2	2.17	2.47
	3	2.04	2.21
	4	2.35	2.61
	5	2.37	2.63
	6	2.47	3.11
	7	2.01	3.03
	Mann-Whitney test		P value=0.0192
	Data are pooled from two independent experiments

## Sheet: 3C
	Figure 3C. The percentages of different thymocyte subpopulations using CD69 and TCRβ in WT and Fam49b-KO mice
	% of TCRβloCD69-	WT	Fam49b-KO		% of TCRβintCD69+	WT	Fam49b-KO
	1	79.9	79.5		1	8.17	10.3
	2	80.3	79.4		2	8.18	9.85
	3	78.5	79.6		3	8.27	11.7
	4	77.3	79.2		4	8.56	11.7
	5	79.6	79.3		5	8.02	9.47
	6	79.2	79.6		6	9.3	9.6
	7	79.9	79.5		7	7.99	9.25
	8	80.8	78.1		8	7.82	9.59
	9	79.9	80.8		9	7.96	9.12
	10	78.5	79		10	9.47	9.47
	11	79.2	77.7		11	9.3	12.6
	12	78.9	79.8		12	9.51	11.9
	Mann-Whitney test		P value=0.7653		Mann-Whitney test		P value=0.0001
	% of TCRβhiCD69+	WT	Fam49b-KO		% of TCRβhiCD69-	WT	Fam49b-KO
	1	5.97	5.86		1	5.6	3.96
	2	6.24	5.75		2	4.94	4.53
	3	7.69	6.22		3	4.2	2.79
	4	8.19	6.17		4	4.58	3.26
	5	7.29	6.22		5	3.79	3.57
	6	7.18	6.01		6	4.44	3.5
	7	7.22	6.29		7	3.73	3.72
	8	6.74	7		8	3.5	4.1
	9	7.13	5.63		9	3.67	3.29
	10	7.77	6.26		10	4.44	3.93
	11	7.18	7.09		11	4.44	3.04
	12	7.15	5.9		12	4.54	2.73
	Mann-Whitney test		P value=0.0003		Mann-Whitney test		P value=0.0038
	Data are representative of five experiments.

## Sheet: 3D
	Figure 3D. Ratio of CD4 SP cells over CD8 SP cells in TCRβhiCD69- thymocyte subpopulation
	CD4 SP/CD8 SP	WT	Fam49b-KO
	1	1.73	2.49
	2	1.86	2.76
	3	1.84	2.69
	4	1.71	2.49
	5	1.85	2.51
	6	2	2.5
	7	1.91	2.93
	8	1.96	3.14
	9	1.94	2.56
	10	1.79	2.6
	11	1.95	2.89
	12	1.85	2.59
	Mann-Whitney test		P value<0.0001
	Data are representative of five experiments.

## Sheet: 3E
	Figure 3E. The percentages of different thymocyte subpopulations using CD5 and TCRβ in WT and Fam49b-KO mice
	% of TCRβloCD5lo	WT	Fam49b-KO		% of TCRβloCD5int	WT	Fam49b-KO
	1	34.2	36.4		1	7.37	10.4
	2	33.9	35.9		2	7.87	10.4
	3	34.9	35.8		3	7.23	10.8
	4	34.4	36.2		4	7.3	10.2
	5	34.6	35.6		5	7.26	10.3
	6	34.3	36		6	7.51	11
	7	34.2	35.3		7	7.61	10.8
	8	34	34		8	7.53	11.2
	9	33.8	35.7		9	7.4	11.2
	10	33.9	34.3		10	7.23	11.2
	11	32.3	34.6		11	7.24	11.7
	12	34	35.9		12	7.46	11.1
	Mann-Whitney test		P value=0.0002		Mann-Whitney test		P value<0.0001
	% of TCRβintCD5hi	WT	Fam49b-KO		% of TCRβhiCD5hi	WT	Fam49b-KO
	1	5.95	7.88		1	11.6	9.9
	2	5.75	7.97		2	10.5	9.46
	3	5.71	7.33		3	11	8.73
	4	5.8	8.21		4	11.3	10.1
	5	5.62	7.38		5	10.8	8.82
	6	5.86	7.62		6	10.2	8.3
	7	5.94	7.98		7	11.2	9.4
	8	6.04	7.65		8	10.2	9.28
	9	5.69	7.6		9	9.83	7.97
	10	5.63	8.65		10	9.38	9.86
	11	5.86	7.99		11	10.8	9.19
	12	5.59	8.68		12	9.1	9
	Mann-Whitney test		P value<0.0001		Mann-Whitney test		P value=0.0005
	Data are representative of five experiments.

## Sheet: 3F
	Figure 3F. Ratio of CD4 SP cells over CD8 SP cells in TCRβhiCD5hi thymocyte subpopulation.
	CD4 SP/CD8 SP	WT	Fam49b-KO
	1	3.15	5
	2	3.37	5.72
	3	3.2	5.23
	4	3.09	5
	5	3.5	5.42
	6	3.56	5.73
	7	3.15	6.31
	8	3.58	6.46
	9	3.59	5.8
	10	3.45	5.77
	11	3.65	6.46
	12	3.53	5.61
	Mann-Whitney test		P value<0.0001
	Data are representative of five experiments.

## Sheet: 3G
	Figure 3G. Frequency of TCRβhiCD24low thymocyte subpopulation among total live thymocytes
	% of TCRβhiCD24low	WT	Fam49b-KO
	1	5.21	3.53
	2	4.72	3
	3	4.91	3.15
	4	4.82	3.45
	5	4.1	3.03
	6	4.17	2.38
	7	4.85	2.76
	8	4.17	2.78
	9	3.62	2.45
	10	3.77	3.33
	11	5.12	3.81
	12	3.6	2.98
	Mann-Whitney test		P value<0.0001
	Data are representative of five experiments.
