# Supplementary material for: Fam49b dampens TCR signal strength to regulate survival of positively selected thymocytes and peripheral T cells
Source: eLife. 2024 Aug 19;13:e76940. doi: 10.7554/eLife.76940 (PMC11333044; doi:10.7554/eLife.76940)
Supplement: Figure 4—source data 1. [file elife-76940-fig4-data1.xlsx]

## Sheet: 4A
	Figure 4A. Frequency of CCR7-/+ cleaved caspase 3+ cells among TCRβhiCD5hi (Signaled) and TCRβ-CD5- (Non-signaled) thymocytes.
	% of Cleaved Caspase3+ among signaled thymocytes	WT	Fam49b-KO		% of CCR7- Cleaved Caspase3+ among signaled thymocytes	WT	Fam49b-KO
	1	0.37	0.62		1	0.23125	0.40796
	2	0.29	0.55		2	0.18705	0.3333
	3	0.32	0.68		3	0.21088	0.41548
	4	0.25	0.72		4	0.174	0.42552
	5	0.26	0.63		5	0.16614	0.41076
	6	0.28	0.61		6	0.16408	0.39772
	7	0.37	0.61		7	0.22496	0.3721
	8	0.29	0.68		8	0.18212	0.44744
	9	0.39	0.37		9	0.23595	0.21053
	10	0.24	0.28		10	0.17088	0.18424
	11	0.27	0.56		11	0.14688	0.36792
	12	0.25	0.41		12	0.16575	0.22222
	13	0.18	0.27		13	0.1143	0.17064
	14	0.23	0.28		14	0.14582	0.16884
	15	0.35	0.46		15	0.23345	0.3381
	16	0.38	0.39		16	0.23142	0.2925
	17	0.49	0.57		17	0.31458	0.43662
	18	0.37	0.55		18	0.22237	0.37345
	19	0.33	0.4		19	0.21219	0.2656
	20	0.37	0.41		20	0.22977	0.31447
	21	0.28	0.43		21	0.18396	0.30057
	Mann-Whitney test		P value<0.0001		Mann-Whitney test		P value<0.0001
	% of CCR7+ Cleaved Caspase3+ among signaled thymocytes	WT	Fam49b-KO		% of Cleaved Caspase3+ among non-signaled thymocytes	WT	Fam49b-KO
	1	0.13875	0.21204		1	0.38	0.73
	2	0.10295	0.2167		2	0.38	0.47
	3	0.10912	0.26452		3	0.39	0.63
	4	0.076	0.29448		4	0.28	0.75
	5	0.09386	0.21924		5	0.25	0.72
	6	0.11592	0.21228		6	0.34	0.83
	7	0.14504	0.2379		7	0.35	0.45
	8	0.10788	0.23256		8	0.22	0.56
	9	0.15405	0.15947		9	0.97	0.42
	10	0.06912	0.09576		10	0.41	0.27
	11	0.12312	0.19208		11	0.45	0.64
	12	0.083	0.18778		12	0.44	0.46
	13	0.0648	0.09936		13	0.37	0.31
	14	0.08418	0.11116		14	0.46	0.35
	15	0.11655	0.1219		15	1.12	0.27
	16	0.14858	0.09633		16	0.86	0.23
	17	0.17542	0.13224		17	1.32	0.39
	18	0.14763	0.17655		18	0.73	0.33
	19	0.11781	0.1332		19	1.05	0.29
	20	0.13875	0.09553		20	0.79	0.22
	21	0.09604	0.12943		21	0.57	0.3
	Mann-Whitney test		P value=0.0017		Mann-Whitney test		P value=0.2910
	% of CCR7- Cleaved Caspase3+ among non-signaled thymocytes	WT	Fam49b-KO		% of CCR7+ Cleaved Caspase3+ among non-signaled thymocytes	WT	Fam49b-KO
	1	0.3762	0.71905		1	0.003762	0.010877
	2	0.37658	0.4653		2	0.003268	0.004888
	3	0.38883	0.59535		3	0.001248	0.034902
	4	0.27804	0.7365		4	0.002044	0.013275
	5	0.24725	0.71064		5	0.0028	0.009648
	6	0.33762	0.81174		6	0.002244	0.017928
	7	0.34685	0.441		7	0.003115	0.009
	8	0.21626	0.55384		8	0.003674	0.006272
	9	0.96224	0.41328		9	0.007663	0.00651
	10	0.40754	0.26595		10	0.002255	0.004104
	11	0.4455	0.63232		11	0.00423	0.00768
	12	0.43736	0.45172		12	0.002552	0.008096
	13	0.36741	0.3038		13	0.002479	0.006262
	14	0.45494	0.34335		14	0.005198	0.00644
	15	1.11776	0.26622		15	0.002688	0.003645
	16	0.85742	0.22839		16	0.00215	0.00161
	17	1.31604	0.38649		17	0.004488	0.003432
	18	0.72854	0.32736		18	0.001825	0.002706
	19	1.04685	0.2871		19	0.003255	0.002987
	20	0.78684	0.2178		20	0.003318	0.002178
	21	0.56772	0.2985		21	0.002109	0.00159
	Mann-Whitney test		P value=0.2715				Too low frequency
	Data are pooled from three independent experiments

## Sheet: 4B
	Figure 4B. Geometric MFI of CD5 on DP thymocytes
	GeoMFI of CD5	WT	Fam49b-KO
	1	810	1193
	2	876	1167
	3	841	1123
	4	820	1171
	5	838	1181
	6	841	1265
	Mann-Whitney test		P value=0.0022
	Data are representative of seven experiments.
