# Supplementary material for: Fam49b dampens TCR signal strength to regulate survival of positively selected thymocytes and peripheral T cells
Source: eLife. 2024 Aug 19;13:e76940. doi: 10.7554/eLife.76940 (PMC11333044; doi:10.7554/eLife.76940)
Supplement: Figure 5—figure supplement 1—source data 1. [file elife-76940-fig5-figsupp1-data1.xlsx]

## Sheet: Figure 5-figure supplement 1B
	Figure 5-figure supplement 1B. Frequency of Annexin V+ and 7AAD+ cells among immature and semi-mature CD8 SP thymocytes from WT and Fam49b-KO mice.
	% Annexin V+ 7-AAD+ among Immature CD8 SP	WT	Fam49b-KO		% Annexin V+ 7-AAD+ among Semi-mature CD8 SP	WT	Fam49b-KO
	1	1.39	4.66		1	9.82	21.8
	2	2.18	3.39		2	13.7	18.3
	3	1.95	2.75		3	12.4	19.7
	4	3.27	3.54		4	10.2	18.8
	Mann-Whitney test		P value=0.0478		Mann-Whitney test		P value=0.0006
	Data are pooled from two independent experiments
