# Supplementary material for: Fam49b dampens TCR signal strength to regulate survival of positively selected thymocytes and peripheral T cells
Source: eLife. 2024 Aug 19;13:e76940. doi: 10.7554/eLife.76940 (PMC11333044; doi:10.7554/eLife.76940)
Supplement: Figure 5—source data 1. [file elife-76940-fig5-data1.xlsx]

## Sheet: 5B
	Figure 5B. Absolute numbers of immature, semi-mature, and mature fraction in TCRβhi CD8 SP thymocytes (upper) and TCRβhi CD4 SP thymocytes (lower
	Immature CD8 SP # (105 cells) CD69hiCD62Llo	WT	Fam49b-KO		Semi-mature CD8 SP # (105 cells) CD69loCD62Llo	WT	Fam49b-KO
	1	6.74	2.39		1	4.27	3.73
	2	5.02	2.52		2	3.35	4.19
	3	5.13	1.99		3	3.5	3.64
	4	5.42	2.87		4	3.44	4.44
	5	4.34	2.1		5	3.26	3.68
	6	4.45	1.33		6	4.07	2.61
	7	5.23	2.78		7	4.69	5.18
	8	5.13	1.18		8	4.56	2.27
	9	3.75	1.8		9	4.27	4.56
	10	5.74	2.32		10	6.92	5.75
	Mann-Whitney test		P value<0.0001		Mann-Whitney test		P value=0.6401
	Mature CD8 SP # (105 cells) CD69loCD62Lhi	WT	Fam49b-KO		Immature CD4 SP # (106 cells) CD69hiCD62Llo	WT	Fam49b-KO
	1	9.76	5.98		1	4.16	3.09
	2	7.7	3.43		2	3.42	3.27
	3	7.18	2.62		3	3.32	2.62
	4	6.32	2		4	3.9	4.07
	5	5.68	2.64		5	3.19	2.89
	6	5.07	1.92		6	3.09	1.78
	7	6.13	1.51		7	3.68	2.88
	8	5.44	1.92		8	3.89	1.69
	9	3.92	3.31		9	3.01	1.84
	10	4.89	1.37		10	4.75	3.13
	Mann-Whitney test		P value<0.0001		Mann-Whitney test		P value=0.0069
	Data are representative of three experiments.

## Sheet: 5E
	Figure 5E. Frequency of Annexin V+ and 7AAD+ cells among immature CD4 SP (left) and semi-mature CD4 SP (right) thymocytes from WT and Fam49b-KO mice.
	% Annexin V+ 7-AAD+ among Immature CD4 SP	WT	Fam49b-KO		% Annexin V+ 7-AAD+ among Semi-mature CD4 SP	WT	Fam49b-KO
	1	1.23	4.04		1	8.44	26.1
	2	1.33	3.44		2	10.4	16.9
	3	1.61	3.06		3	9.23	20.1
	4	2.07	3.51		4	9.44	19.7
	Mann-Whitney test		P value=0.0004		Mann-Whitney test		P value=0.0084
	Data are pooled from two independent experiments
