# Supplementary material for: Fam49b dampens TCR signal strength to regulate survival of positively selected thymocytes and peripheral T cells
Source: eLife. 2024 Aug 19;13:e76940. doi: 10.7554/eLife.76940 (PMC11333044; doi:10.7554/eLife.76940)
Supplement: Figure 6—figure supplement 1—source data 1. [file elife-76940-fig6-figsupp1-data1.xlsx]

## Sheet: Figure 6-figure supplement 1A
	Figure 6-figure supplement 1A. Absolute number of T cell subset in peripheral lymph nodes from OT-I and Fam49b-KO OT-I mice at either 6 weeks or 12 weeks of age
	TCR-Vα2+ CD8 T # (105 cells) CD62L+CD44lo, 6 weeks	WT	Fam49b-KO		TCR-Vα2+ CD8 T # (105 cells) CD62L-CD44lo, 6 weeks	WT	Fam49b-KO
	1	24.013	14.289		1	17.152	7.822
	2	10.37	19.024		2	5.988	11.148
	3	36.596	18.421		3	13.021	10.453
	4	17.075	24.639		4	7.367	15.399
	5	14.255			5	9.064
	Mann-Whitney test		P value=0.7302		Mann-Whitney test		P value=0.7302
	TCR-Vα2+ CD8 T # (105 cells) CD62L-CD44hi, 6 weeks	WT	Fam49b-KO		TCR-Vα2+ CD8 T # (105 cells) CD62L+CD44hi, 6 weeks	WT	Fam49b-KO
	1	1.069	0.808		1	2.308	2.658
	2	0.325	0.989		2	0.768	2.932
	3	1.807	0.95		3	5.965	4.222
	4	0.628	1.729		4	1.524	5.639
	5	0.847			5	1.666
	Mann-Whitney test		P value=0.7302		Mann-Whitney test		P value=0.1905
	TCR-Vα2+ CD8 T # (105 cells) CD62L+CD44lo, 12 weeks	WT	Fam49b-KO		TCR-Vα2+ CD8 T # (105 cells) CD62L-CD44lo, 12 weeks	WT	Fam49b-KO
	1	7.666	0.621		1	7.463	0.572
	2	3.529	1.96		2	5.889	1.08
	3	7.803	4.61		3	10.178	4
	4	11.485	3.46		4	16.671	0.894
	5	5.418			5	3.84
	6	7.557			6	10.66
	Mann-Whitney test		P value=0.0190		Mann-Whitney test		P value=0.0190
	TCR-Vα2+ CD8 T # (105 cells) CD62L-CD44hi, 12 weeks	WT	Fam49b-KO		TCR-Vα2+ CD8 T # (105 cells) CD62L+CD44hi, 12 weeks	WT	Fam49b-KO
	1	1.478	0.284		1	1.866	0.429
	2	0.374	1.16		2	0.56	3.06
	3	0.776	1.59		3	1.181	2.5
	4	1.836	0.452		4	1.823	1.86
	5	0.79			5	1.732
	6	0.725			6	1.195
	Mann-Whitney test		P value=0.7619		Mann-Whitney test		P value=0.3524
	Data are pooled from two independent experiments

## Sheet: Figure 6-figure supplement 1B
	Figure 6-figure supplement 1B. Frequency of Annexin V+ and 7AAD+ cells among naïve T cellsfrom WT and Fam49b-KO mice.
	% Annexin V+ 7-AAD+ among Naïve CD8 T	WT	Fam49b-KO		% Annexin V+ 7-AAD+ among Naïve CD4 T	WT	Fam49b-KO
	1	1.15	1.71		1	0.43	0.9
	2	1.04	1.28		2	0.89	0.95
	3	0.79	1.17		3	0.57	0.81
	4	1.31	1.19		4	0.55	0.9
	5	0.71	1.14		5	0.54	0.9
	6	0.77	2.15		6	10.2	18.8
	Mann-Whitney test		P value=0.0411		Mann-Whitney test		P value=0.0159
	Data are pooled from two independent experiments
