# Supplementary material for: Fam49b dampens TCR signal strength to regulate survival of positively selected thymocytes and peripheral T cells
Source: eLife. 2024 Aug 19;13:e76940. doi: 10.7554/eLife.76940 (PMC11333044; doi:10.7554/eLife.76940)
Supplement: Figure 6—figure supplement 2—source data 2. [file elife-76940-fig6-figsupp2-data2.xlsx]

## Sheet: Figure 6-figure supplement 2B
	Figure 6-figure supplement 2B .Ratios of BIM/Bcl-2 expression of naïve CD4 T cells and total thymocytes in WT or Fam49b-KO mice
	BIM/Bcl-2 ratio in naïve CD4 T cells	WT	Fam49b-KO		BIM/Bcl-2 ratio in total thymocytes	WT	Fam49b-KO
	1	0.552289	3.29493		1	0.580761	4.83677
	2	0.409618	2.49899		2	0.428834	3.59584
	3	0.320794	2.14171		3	0.550483	3.75684
	Mann-Whitney test		P value=0.0196		Mann-Whitney test		P value=0.0110
	Data are pooled from two independent experiments
