# Supplementary material for: Fam49b dampens TCR signal strength to regulate survival of positively selected thymocytes and peripheral T cells
Source: eLife. 2024 Aug 19;13:e76940. doi: 10.7554/eLife.76940 (PMC11333044; doi:10.7554/eLife.76940)
Supplement: Figure 6—source data 1. [file elife-76940-fig6-data1.xlsx]

## Sheet: 6B
	Figure 6B. Absolute numbers of TCR-Vα2+ CD8 SP thymocytes from OT-I and Fam49b-KO OT-I mice at 6 weeks of age.
	TCR-Vα2+ CD8 SP # (106 cells)	WT	Fam49b-KO
	1	2.46	1.52
	2	2.21	1.39
	3	1.69	1.55
	4	1.86	2.73
	5	1.18	2.15
	6	3.09	2.59
	7	1.93
	8	2.17
	Mann-Whitney test		P value=0.7887
	Data are pooled from two independent experiments

## Sheet: 6C
	Figure 6C. Percentage and absolulte numbers of TCR-Vα2+ CD8 T cells in lymph nodes from OT-I and Fam49b-KO OT-I mice at either 6 weeks (upper left) or 12 weeks (lower left) of age.
	% TCR-Vα2+ CD8 T cells 6 weeks	WT	Fam49b-KO		TCR-Vα2+ CD8 T cells # (106 cells) 6 weeks	WT	Fam49b-KO
	1	38.8	34.5		1	4.98113	1.39954
	2	36.9	33.4		2	2.63331	3.54375
	3	40.1	30.3		3	1.95742	2.58201
	4	38	33.9		4	4.50456	3.46115
	5	41	33.2		5	1.76871	3.44634
	6	25.3	35.4		6	5.83522	4.81043
	7	32.2			7	2.70834
	8	35.1			8	2.62708
	Mann-Whitney test		P value=0.2355		Mann-Whitney test		P value=0.8147
	% TCR-Vα2+ CD8 T cells 12 weeks	WT	Fam49b-KO		TCR-Vα2+ CD8 T cells # (106 cells) 12 weeks	WT	Fam49b-KO
	1	23.3	14.7		1	1.87158	0.19671
	2	31.3	19.7		2	1.04653	0.73892
	3	42.2	21.2		3	2.01988	1.2957
	4	29.8	20.9		4	3.25315	0.68025
	5	28.3			5	1.18979
	6	45.1			6	2.03955
	Mann-Whitney test		P value=0.0077		Mann-Whitney test		P value=0.0173
	Data are pooled from three independent experiments

## Sheet: 6D
	Figure 6D. Percentage and absolulte numbers of Naive TCR-Vα2+ CD8 T cells in lymph nodes from OT-I and Fam49b-KO OT-I mice at either 6 weeks (upper left) or 12 weeks (lower left) of age.
	% Naïve TCR-Vα2+ CD8 T cells 6 weeks	WT	Fam49b-KO		Naïve TCR-Vα2+ CD8 T cells # (105 cells) 6 weeks	WT	Fam49b-KO
	1	20.26	16.77		1	24.013	14.3
	2	24.04	18.63		2	10.37	19
	3	15.87	17.75		3	36.596	18.4
	4	20.3	18.13		4	17.075	24.6
	5	19.05			5	14.255
	Mann-Whitney test		P value=0.1921		Mann-Whitney test		P value=0.7944
	% Naïve TCR-Vα2+ CD8 T cells 12 weeks	WT	Fam49b-KO		Naïve TCR-Vα2+ CD8 T cells # (105 cells) 12 weeks	WT	Fam49b-KO
	1	9.54	4.64		1	7.67	0.621
	2	10.56	10.49		2	3.53	1.96
	3	16.3	5.21		3	7.8	4.61
	4	10.52	7.55		4	11.5	3.46
	5	12.89	10.64		5	7.56
	6	16.71
	Mann-Whitney test		P value=0.0204		Mann-Whitney test		P value=0.0154
	Data are pooled from two independent experiments

## Sheet: 6E
	Figure 6E. A 7AAD/Annexin V staining in Naïve CD8 T cells in peripheral lymph nodes (top) and spleen (lower) from OT-I and Fam49b-KO OT-I mice.
	% Annexin V+ 7-AAD+ in naïve CD8 T cells PLN	WT	Fam49b-KO		% Annexin V+ 7-AAD+ in naïve CD8 T cells Spleen	WT	Fam49b-KO
	1	1.08	1.71		1	1.29	3.5
	2	1.67	2.46		2	2	2.79
	3	1.32	5.39		3	1.72	6.9
	4	1.18	2.36		4	1.38	2.53
	Mann-Whitney test		P value=0.0286		Mann-Whitney test		P value=0.0286
	Data are pooled from two independent experiments
