# Supplementary material for: Fam49b dampens TCR signal strength to regulate survival of positively selected thymocytes and peripheral T cells
Source: eLife. 2024 Aug 19;13:e76940. doi: 10.7554/eLife.76940 (PMC11333044; doi:10.7554/eLife.76940)
Supplement: Figure 7—figure supplement 2—source data 1. [file elife-76940-fig7-figsupp2-data1.xlsx]

## Sheet: Figure 7-figure supplement 2A
	Figure 7-figure supplement 2A. Total number of Foxp3+ regulatory T cells in peripheral lymph nodes from WT and Fam49b-KO mice
	Foxp3+ Treg # (105 cells)	WT	Fam49b-KO
	1	4.48	3.64
	2	4.33	3.46
	3	4.44	4.34
	4	4.51	2.92
	5	4.37	3.52
	6	3.68	3.14
	7	5.84	3.07
	8		2.67
	Mann-Whitney test		P value=0.0012
	Data are representative of seven experiments

## Sheet: Figure 7-figure supplement 2B
	Figure 7-figure supplement 2B. Frequency of CD4+TCRαβ+ IELs, CD4+CD8α+TCRαβ IELs, and CD4-CD8α-TCRαβ IELs T among total live IELs T cells in WT and Fam49b-KO mice
	% of CD4+TCRαβ+ IELs	WT	Fam49b-KO		% of CD4+CD8α+TCRαβ+ IELs	WT	Fam49b-KO
	1	1.46	3.73		1	0.63	2.78
	2	1.43	2.68		2	2.31	4.27
	3	0.99	3.46		3	0.41	3.02
	4	1.28	2.68		4	0.48	1.13
	5	2.04	3.28		5	1.26	4.07
	6	2.01	4.2		6	1.18	1.67
	7	1.8	7.01		7	1.32	2.44
	8	1.8	4.32		8	1.32	0.79
	9	2.15	2.62		9	0.7	3.15
	10	0.9	4.06		10	0.82	1.86
	11	1.97	3.93		11	2.8	3.6
	12	1.76	9.41		12	0.79	1.36
	Mann-Whitney test		P value<0.0001		Mann-Whitney test		P value=0.0025
	% of CD4+CD8α+TCRαβ+ IELs	WT	Fam49b-KO
	1	1.02	0.75
	2	1.23	1.21
	3	1.43	1.18
	4	0.61	1.52
	5	0.54	2.78
	6	0.99	5
	7	1.1	1.1
	8	1.1	1.83
	9	0.49	0.94
	10	0.52	0.9
	11	0.62	1.2
	12	0.49	0.96
	Mann-Whitney test		P value=0.0235
	Data are pooled from six independent experiments
