# Supplementary material for: Fam49b dampens TCR signal strength to regulate survival of positively selected thymocytes and peripheral T cells
Source: eLife. 2024 Aug 19;13:e76940. doi: 10.7554/eLife.76940 (PMC11333044; doi:10.7554/eLife.76940)
Supplement: Figure 7—figure supplement 3—source data 1. [file elife-76940-fig7-figsupp3-data1.xlsx]

## Sheet: Figure 7-figure supplement 3A
	Figure 7-figure supplement 3A. Frequency and absolute numbers of IEL precuror cells in thymus from WT and Fam49b-KO mice
	% of PD-1+ Type A IELps among total IELps	WT	Fam49b-KO		% of PD-1- Type B IELps among total IELps	WT	Fam49b-KO
	1	73.4	62.6		1	26.4	36.9
	2	72.9	54.4		2	26.7	44.7
	3	73	50.5		3	26.8	49.2
	4	65.5	44.9		4	34.5	54.8
	5	77.8	58.3		5	22.2	41.3
	6	71.9	53.8		6	27.9	45.8
	7	84	47.6		7	15.6	51.8
	Mann-Whitney test		P value<0.0001		Mann-Whitney test		P value<0.0001
	PD-1+ Type A IELps # (103 cells)	WT	Fam49b-KO		PD-1- Type B IELps # (103 cells)	WT	Fam49b-KO
	1	23	27.1		1	8.28	16
	2	21.6	29.6		2	7.91	24.3
	3	23.6	19.4		3	8.66	18.9
	4	15.4	7.34		4	8.12	8.96
	5	16.9	19.1		5	4.83	13.5
	6	33.7	23.8		6	13.1	20.3
	7	34	23.2		7	6.31	25.2
	Mann-Whitney test		P value=0.5080		Mann-Whitney test		P value=0.0030
	Data are representative of three experiments
