# Supplementary material for: Fam49b dampens TCR signal strength to regulate survival of positively selected thymocytes and peripheral T cells
Source: eLife. 2024 Aug 19;13:e76940. doi: 10.7554/eLife.76940 (PMC11333044; doi:10.7554/eLife.76940)
Supplement: Figure 7—source data 1. [file elife-76940-fig7-data1.xlsx]

## Sheet: 7A
	Figure 7A. Frequency of agonist selected T cells
	% of CD8αα+ TCRβ+ IELs T cells	WT	Fam49b-KO		% of iNKT cells	WT	Fam49b-KO
	1	17.37	4.13		1	20.1	19.3
	2	21.45	8.4		2	22.4	22.9
	3	19.72	8.18		3	20.8	20.6
	4	22.76	10.65		4	21.2	24.1
	5	21.84	9.87		5	23.6	13.3
	6	22.92	16.92		6	23.9	22.6
	7	14.41	3.83		Mann-Whitney test		P value=0.6991
	8	25.14	7.22
	9	25.14	11.12		Data are representative of four experiments
	10	18.96	6.79
	11	20.36	9.55
	12	16.5	1.85
	13	18.82
	Mann-Whitney test		P value<0.0001
	Data are pooled from seven independent experiments
	% of Treg	WT	Fam49b-KO
	1	15	18.5
	2	15.6	16.8
	3	13.7	18
	4	13.3	17.5
	5	16	22.8
	6	16.1	20.2
	7	15.6	18.6
	8	17.1	18.1
	Mann-Whitney test		P value=0.0003
	Data are representative of seven experiments

## Sheet: 7B
	Figure 7B. Frequency of IELs T subsets among total live IELs T cells
	% of TCRγδ+ IELs T cells	WT	Fam49b-KO		% of CD8αα+TCRαβ+ IELs T cells	WT	Fam49b-KO
	1	54.56	37.89		1	17.37	4.13
	2	39.12	47.35		2	21.45	8.4
	3	53.32	25		3	19.72	8.18
	4	53.34	32.73		4	22.76	10.65
	5	53.68	32.18		5	21.84	9.87
	6	38.76	23.13		6	22.92	16.92
	7	47.43	31.3		7	14.41	3.83
	8	35.74	36.58		8	25.14	7.22
	9	43.55	33.96		9	25.14	11.12
	10	50.9	32.87		10	18.96	6.79
	11	56.64	38.1		11	20.36	9.55
	12	49.3	14.67		12	16.5	1.85
	13	49.28			13	18.82
	Mann-Whitney test		P value<0.0001		Mann-Whitney test		P value<0.0001
	% of CD8αβ+TCRβ+ IELs T cells	WT	Fam49b-KO
	1	10.51	19.48
	2	12.07	24.68
	3	12.66	23.78
	4	5.78	18.03
	5	6.18	22.18
	6	18.32	17.4
	7	10.46	10.84
	8	12.65	16.92
	9	12.65	31.28
	10	10.03	22.14
	11	7.87	25.66
	12	11.76	12.94
	13	10.18
	Mann-Whitney test		P value<0.0001
	Data are pooled from seven independent experiments.

## Sheet: 7C
	Figure 7C. Frequency of CD5+ T cells and CD5- T cells among total CD3ε+ IELs T cells in WT and Fam49b-KO mice.
	% of CD5- IELs T cells	WT	Fam49b-KO		% of CD5+ IELs T cells	WT	Fam49b-KO
	1	85.2	66.9		1	14.6	32.8
	2	86.6	74.9		2	13.2	24.5
	3	89.3	68.8		3	10.6	31
	4	89.3	72.4		4	10.6	27.2
	5	89.5	63		5	10.3	36.7
	6	93.9	71.1		6	5.86	28.6
	7	85	66.1		7	14.6	33.6
	8	88.8	53.3		8	10.9	45.9
	Mann-Whitney test		P value=0.0002		Mann-Whitney test		P value=0.0002
	Data are pooled from six independent experiments.
